# Supplementary material
Source: MDPI journal article supplement (https://www.mdpi.com/2072-4292/14/13/2995)
Supplement: s1 [file s1]

# Supplementary Material

**Supplementary Table S1.** Species inventory of all the species that were observed when sampling the field plots.

| Species Name                 | Species Abundance |
|------------------------------|-------------------|
| <i>Aloe maculata</i>         | 5                 |
| <i>Asparagus</i> spp.        | 87                |
| <i>Dracaena trifasciata</i>  | 21                |
| <i>Ehretia rigida</i>        | 8                 |
| <i>Eragostis</i> spp.        | 2477              |
| <i>Grewia flava</i>          | 18                |
| <i>Kalanchoe</i> spp.        | 15                |
| <i>Ledebouria marginata</i>  | 4                 |
| <i>Leonotis ocymifolia</i>   | 161               |
| <i>Leucas martinicensis</i>  | 1                 |
| <i>Lipia javani</i>          | 1                 |
| <i>Meitinas Polyacantha</i>  | 6                 |
| <i>Olea</i> spp.             | 11                |
| <i>Opuntia ficas indica</i>  | 16                |
| <i>Scorzonera humilis</i> L. | 647               |
| <i>Senegalia nigrescens</i>  | 566               |
| <i>Trifolium repens</i>      | 700               |
| <i>Ziziphus moconata</i>     | 1                 |

**Supplementary Table S2.** PERMANOVA results from comparing the difference in species composition amongst the sampled plots, where Df is the degrees of freedom, SumsOfSqs is the sum of squares, MeanSqs represents the mean sum of squares, and F.Model is the pseudo F-ratio. R<sup>2</sup> is the coefficient of determination, and Pr(>F) is the significance at the 95% confidence interval.

|           | Df | SumsOfSqs | MeanSqs | F.Model | R <sup>2</sup> | Pr(>F) |
|-----------|----|-----------|---------|---------|----------------|--------|
| Plot      | 1  | 18,231    | 18,231  | 0.40407 | 0.0153         | 0.79   |
| Residuals | 26 | 1,173,110 | 45,120  |         | 0.9847         |        |
| Total     | 27 | 1,191,341 |         |         | 1.0000         |        |
